# Supplementary material
Source: publisher figshare collection journal article supplement (https://gsajournals.figshare.com/ndownloader/files/23777579)
Supplement: Supplementary file 1 [file 23777579]

## Sheet: SY LOH Details
Table S4. Distribution of 316 LOH tracts in the 100th bottleneck of S/Y hybrid. LOH tracts supported by two or more SNPs.
Line	Chromosome position	Track size (bp)	Fixation	Centromere distance (bp)	Telomere distance (bp)	Telomere (L/R)
SY_1	chr1:21201-21425	224	S288c	130099	20400	Left
SY_1	chr2:8297-14697	6400	YJM789	223568	1689	Left
SY_1	chr2:174642-174723	81	S288c	63542	168034	Left
SY_1	chr3:114430-114475	45	S288c	0	113332	Left
SY_1	chr3:292550-292623	73	S288c	178107	23160	Right
SY_1	chr4:18667.5-18692.5	25	S288c	431074	17763.5	Left
SY_1	chr4:1154143.5-1154440	296.5	S288c	704378	370185	Right
SY_1	chr5:243554-243700.5	146.5	S288c	91508	237081	Left
SY_1	chr5:561445.5-561533.5	88	S288c	409400	8065.5	Right
SY_1	chr5:561634-561752.5	118.5	S288c	409588	7846.5	Right
SY_1	chr5:565663-565716.5	53.5	S288c	413617	3882.5	Right
SY_1	chr7:496965-497024.5	59.5	S288c	0	496184	Left
SY_1	chr7:1079088-1079127	39	S288c	582109	4508	Right
SY_1	chr8:212522.5-214395.5	1873	S288c	106878	207018	Left
SY_1	chr9:245927-246061	134	S288c	109626	193007	Right
SY_1	chr9:393200.5-393243	42.5	S288c	37513.5	45825	Right
SY_1	chr9:437951.5-437972	20.5	S288c	82264.5	1096	Right
SY_1	chr10:436387.5-436545.5	158	S288c	21.5	308356	Right
SY_1	chr10:538025-538286	261	S288c	101659	206616	Right
SY_1	chr11:440124.5-440212	87.5	YJM789	0	225692	Right
SY_1	chr12:994313-995728	1415	YJM789	843425	68553	Right
SY_1	chr13:156288-160049	3761	S288c	108041	149944	Left
SY_1	chr13:463297-463416.5	119.5	S288c	195207	456953	Left
SY_1	chr14:412497.5-412933	435.5	YJM789	215883	370345	Right
SY_1	chr14:651655-651971	316	S288c	22839	131307	Right
SY_1	chr16:20013-20064.5	51.5	YJM789	535950	12790	Left
SY_1	chr16:62827.5-63301.5	474	S288c	492714	55604.5	Left
SY_2	chr1:18565-19877.5	1312.5	S288c	131646	17764	Left
SY_2	chr2:4140-14697	10557	YJM789	223568	0	Left
SY_2	chr3:224983-227794.5	2811.5	S288c	110540	87988.5	Right
SY_2	chr3:295204-295355.5	151.5	YJM789	180761	20427.5	Right
SY_2	chr4:488756.5-513201	24444.5	S288c	38990.5	487852	Left
SY_2	chr4:1523970-1524477	507	S288c	1074204	148	Right
SY_2	chr5:100329.5-100395.5	66	S288c	51650.5	93856.5	Left
SY_2	chr5:561517-561533.5	16.5	S288c	409471	8065.5	Right
SY_2	chr5:564446-564467	21	S288c	412400	5132	Right
SY_2	chr7:1024760.5-1025448	687.5	S288c	527782	58187	Right
SY_2	chr8:192910-194302	1392	S288c	87266	187405	Left
SY_2	chr9:187622-189769.5	2147.5	YJM789	165918	179838	Left
SY_2	chr9:437951.5-437972	20.5	S288c	82264.5	1096	Right
SY_2	chr10:24456.5-24510	53.5	S288c	411856	16689.5	Left
SY_2	chr10:507802.5-509177	1374.5	S288c	71436.5	235725	Right
SY_2	chr12:994313-995728	1415	YJM789	843425	68553	Right
SY_2	chr13:156288-160049	3761	S288c	108041	149944	Left
SY_2	chr13:375409-378622	3213	S288c	107319	369065	Left
SY_2	chr13:923646-923683	37	S288c	655556	0	Right
SY_2	chr14:651655-651971	316	S288c	22839	131307	Right
SY_2	chr15:120355-123357.5	3002.5	S288c	203286	119508	Left
SY_2	chr15:760912-763551	2639	S288c	434269	320371	Right
SY_2	chr16:59294.5-62376	3081.5	S288c	493639	52071.5	Left
SY_3	chr1:9226-12578	3352	S288c	138946	8425	Left
SY_3	chr1:18542.5-19877.5	1335	S288c	131646	17741.5	Left
SY_3	chr1:22612-22750.5	138.5	S288c	128774	21811	Left
SY_3	chr1:26559-31787	5228	S288c	119737	25758	Left
SY_3	chr1:34188-70286.5	36098.5	S288c	81237.5	33387	Left
SY_3	chr1:205601-207330	1729	S288c	54077	22081	Right
SY_3	chr2:75883.5-76591.5	708	YJM789	161674	69275.5	Left
SY_3	chr2:613126-617067	3941	YJM789	374861	195312	Right
SY_3	chr2:617356-617880.5	524.5	YJM789	379091	194498	Right
SY_3	chr4:954193-956560	2367	S288c	504427	568065	Right
SY_3	chr5:100329.5-100371.5	42	S288c	51674.5	93856.5	Left
SY_3	chr5:363651.5-365305	1653.5	YJM789	211606	204294	Right
SY_3	chr5:564392-564478.5	86.5	S288c	412346	5120.5	Right
SY_3	chr6:92365.5-92478.5	113	S288c	56089.5	86835.5	Left
SY_3	chr6:169513.5-170107	593.5	YJM789	20945.5	99624	Right
SY_3	chr7:147228-148594.5	1366.5	S288c	348384	146447	Left
SY_3	chr7:678641-680710.5	2069.5	S288c	181662	402924	Right
SY_3	chr7:883676-884698.5	1022.5	YJM789	386697	198936	Right
SY_3	chr7:1079088-1079127	39	S288c	582109	4508	Right
SY_3	chr8:175887.5-212396	36508.5	S288c	70243.5	170382	Left
SY_3	chr8:214234-293554.5	79320.5	S288c	108590	208729	Left
SY_3	chr8:298111.5-528401	230290	S288c	192468	27704	Right
SY_3	chr8:543315.5-556290	12974.5	YJM789	437672	0	Right
SY_3	chr12:322988-1061966.5	738978	YJM789	172100	2314.5	Right
SY_3	chr12:1063177-1066553	3376	YJM789	912289	0	Right
SY_3	chr13:141474-144060	2586	S288c	124030	135130	Left
SY_3	chr13:363012.5-363323.5	311	S288c	94922.5	356668	Left
SY_3	chr13:503156.5-503295.5	139	S288c	235066	420246	Right
SY_3	chr13:776542-923683	147141	S288c	508452	0	Right
SY_3	chr14:164301-170276.5	5975.5	YJM789	458540	156873	Left
SY_3	chr14:488264.5-490831	2566.5	YJM789	137985	292447	Right
SY_3	chr15:550717.5-552956	2238.5	S288c	224074	530966	Right
SY_3	chr16:19647-19824.5	177.5	S288c	536190	12424	Left
SY_3	chr16:403423.5-404926.5	1503	YJM789	151088	396200	Left
SY_3	chr16:452693-454825	2132	YJM789	101190	445470	Left
SY_4	chr1:21201-21425	224	S288c	130099	20400	Left
SY_4	chr1:198646-198692	46	S288c	47122	30719	Right
SY_4	chr4:18667.5-18692.5	25	S288c	431074	17763.5	Left
SY_4	chr4:915522-916701.5	1179.5	YJM789	465756	607924	Right
SY_4	chr5:561280.5-561354	73.5	S288c	409234	8245	Right
SY_4	chr5:561368.5-561533.5	165	S288c	409322	8065.5	Right
SY_4	chr5:561562-561634	72	S288c	409516	7965	Right
SY_4	chr5:564392-564478.5	86.5	S288c	412346	5120.5	Right
SY_4	chr5:566553.5-566940	386.5	S288c	414508	2659	Right
SY_4	chr7:165.5-21029	20863.5	YJM789	475950	0	Left
SY_4	chr7:21059-197065.5	176006	YJM789	299914	20278	Left
SY_4	chr9:33466.5-33494	27.5	S288c	322193	25682.5	Left
SY_4	chr9:393200.5-393243	42.5	S288c	37513.5	45825	Right
SY_4	chr9:437951.5-437972	20.5	S288c	82264.5	1096	Right
SY_4	chr10:24456.5-24510	53.5	S288c	411856	16689.5	Left
SY_4	chr10:538025-538286	261	S288c	101659	206616	Right
SY_4	chr11:386673.5-387567	893.5	S288c	52621	278337	Right
SY_4	chr12:687484-687609.5	125.5	S288c	536596	376672	Right
SY_4	chr13:375409-378622	3213	S288c	107319	369065	Left
SY_4	chr13:463297-463403.5	106.5	S288c	195207	456953	Left
SY_4	chr14:280916-301468.5	20552.5	YJM789	327348	273488	Left
SY_4	chr14:651655-651971	316	S288c	22839	131307	Right
SY_4	chr15:120355-123357.5	3002.5	S288c	203286	119508	Left
SY_4	chr15:336113-337451	1338	YJM789	9470	335266	Left
SY_4	chr15:385150.5-385259.5	109	S288c	58507.5	384304	Left
SY_4	chr15:970220.5-973365	3144.5	S288c	643578	110557	Right
SY_4	chr16:64578.5-64613	34.5	S288c	491402	57355.5	Left
SY_5	chr1:203886-203978.5	92.5	S288c	52362	25432.5	Right
SY_5	chr4:915522-916701.5	1179.5	YJM789	465756	607924	Right
SY_5	chr5:443407-446608	3201	S288c	291361	122991	Right
SY_5	chr5:561368.5-561480.5	112	S288c	409322	8118.5	Right
SY_5	chr5:561562-561634	72	S288c	409516	7965	Right
SY_5	chr5:564392-564446	54	S288c	412346	5153	Right
SY_5	chr5:565663-565716.5	53.5	S288c	413617	3882.5	Right
SY_5	chr6:92365.5-92478.5	113	S288c	56089.5	86835.5	Left
SY_5	chr7:165.5-21029	20863.5	YJM789	475950	0	Left
SY_5	chr7:21059-145467.5	124408	YJM789	351512	20278	Left
SY_5	chr7:145585.5-197065.5	51480	YJM789	299914	144804	Left
SY_5	chr7:1079050-1079127	77	S288c	582071	4508	Right
SY_5	chr8:12692.5-12774.5	82	S288c	92869.5	7187.5	Left
SY_5	chr11:386673.5-387567	893.5	S288c	52621	278337	Right
SY_5	chr13:375409-378622	3213	S288c	107319	369065	Left
SY_5	chr13:923638-923683	45	S288c	655548	0	Right
SY_5	chr14:280916-301468.5	20552.5	YJM789	327348	273488	Left
SY_5	chr15:336113-337451	1338	YJM789	9470	335266	Left
SY_5	chr16:59294.5-62376	3081.5	S288c	493639	52071.5	Left
SY_6	chr1:205601-207330	1729	S288c	54077	22081	Right
SY_6	chr4:526713-526748.5	35.5	S288c	76947	525809	Left
SY_6	chr4:640308-644013.5	3705.5	S288c	190542	639404	Left
SY_6	chr4:1342790-1345159	2369	YJM789	893024	179466	Right
SY_6	chr5:207204.5-207352.5	148	S288c	55158.5	200732	Left
SY_6	chr5:564323.5-564366	42.5	S288c	412278	5233	Right
SY_6	chr5:564392-564446	54	S288c	412346	5153	Right
SY_6	chr6:92448.5-92478.5	30	S288c	56089.5	86918.5	Left
SY_6	chr6:191831.5-191851.5	20	S288c	43263.5	77879.5	Right
SY_6	chr7:73908.5-74253	344.5	S288c	422726	73127.5	Left
SY_6	chr8:12692.5-12744	51.5	S288c	92900	7187.5	Left
SY_6	chr8:153618.5-528401	374782	S288c	47974.5	27704	Right
SY_6	chr9:393200.5-393243	42.5	S288c	37513.5	45825	Right
SY_6	chr9:437951.5-437972	20.5	S288c	82264.5	1096	Right
SY_6	chr9:438997-439006	9	S288c	83310	62	Right
SY_6	chr12:70154.5-79567	9412.5	S288c	71321	58069.5	Left
SY_6	chr12:96158.5-96799	640.5	S288c	54089	84073.5	Left
SY_6	chr12:687484-687609.5	125.5	S288c	536596	376672	Right
SY_6	chr12:1064273.5-1066553	2279.5	S288c	913386	0	Right
SY_6	chr13:503156.5-503295.5	139	S288c	235066	420246	Right
SY_6	chr15:790853-793303.5	2450.5	YJM789	464210	290618	Right
SY_6	chr16:64578.5-64613	34.5	S288c	491402	57355.5	Left
SY_6	chr16:111277.5-113004.5	1727	YJM789	443010	104054	Left
SY_7	chr2:374726-381713.5	6987.5	S288c	136461	368118	Left
SY_7	chr5:3109.5-561526.5	558417	YJM789	0	0	Left
SY_7	chr5:561634-564366	2732	YJM789	409588	5233	Right
SY_7	chr5:564392-565716.5	1324.5	YJM789	412346	3882.5	Right
SY_7	chr5:566553.5-566940	386.5	YJM789	414508	2659	Right
SY_7	chr5:567509-568423	914	YJM789	415463	1176	Right
SY_7	chr6:252195.5-264302.5	12107	YJM789	103628	5428.5	Right
SY_7	chr7:73908.5-74253	344.5	S288c	422726	73127.5	Left
SY_7	chr7:453797.5-454931.5	1134	YJM789	42047.5	453016	Left
SY_7	chr8:298111.5-305071	6959.5	YJM789	192468	251034	Right
SY_7	chr9:438997-439006	9	S288c	83310	62	Right
SY_7	chr12:1063177-1064276	1099	S288c	912289	5	Right
SY_7	chr14:582832.5-593902	11069.5	YJM789	34914	189376	Right
SY_7	chr15:302478.5-303529	1050.5	S288c	23114	301632	Left
SY_7	chr16:64578.5-64613	34.5	S288c	491402	57355.5	Left
SY_8	chr1:116425.5-203378.5	86953	YJM789	0	26032.5	Right
SY_8	chr1:205601-207330	1729	YJM789	54077	22081	Right
SY_8	chr2:23987.5-118130.5	94143	YJM789	120134	17379.5	Left
SY_8	chr2:185700-197646.5	11946.5	YJM789	40618.5	179092	Left
SY_8	chr2:197746-335678	137932	YJM789	0	191138	Left
SY_8	chr2:338873.5-393366	54492.5	YJM789	100608	332266	Left
SY_8	chr2:558070.5-627661	69590.5	YJM789	319806	184718	Right
SY_8	chr3:1969.5-82499.5	80530	S288c	31943.5	871.5	Left
SY_8	chr3:82883-162345	79462	S288c	0	81785	Left
SY_8	chr3:273922.5-303930.5	30008	S288c	159480	11852.5	Right
SY_8	chr3:307581.5-308292.5	711	S288c	193138	7490.5	Right
SY_8	chr4:165743-256888	91145	YJM789	192878	164839	Left
SY_8	chr4:301908.5-302737	828.5	YJM789	147029	301004	Left
SY_8	chr4:427663-517211.5	89548.5	YJM789	0	426759	Left
SY_8	chr4:538640-540705.5	2065.5	YJM789	88874	537736	Left
SY_8	chr4:898075.5-926224	28148.5	YJM789	448310	598401	Right
SY_8	chr4:927297.5-984211	56913.5	YJM789	477532	540414	Right
SY_8	chr4:990187.5-1062548	72360.5	YJM789	540422	462077	Right
SY_8	chr4:1154363-1154440	77	S288c	704597	370185	Right
SY_8	chr4:1166499-1267026.5	100528	S288c	716733	257598	Right
SY_8	chr5:3109.5-30963.5	27854	S288c	121082	0	Left
SY_8	chr5:32113-34198	2085	S288c	117848	25640	Left
SY_8	chr5:58799-63815.5	5016.5	YJM789	88230.5	52326	Left
SY_8	chr5:108877.5-309793.5	200916	YJM789	0	102404	Left
SY_8	chr5:312586.5-561533.5	248947	YJM789	160540	8065.5	Right
SY_8	chr5:561562-564366	2804	YJM789	409516	5233	Right
SY_8	chr5:564392-565716.5	1324.5	YJM789	412346	3882.5	Right
SY_8	chr5:566553.5-566940	386.5	YJM789	414508	2659	Right
SY_8	chr5:567509-568423	914	YJM789	415463	1176	Right
SY_8	chr6:55179-74684	19505	YJM789	73884	49649	Left
SY_8	chr6:75789.5-211309.5	135520	YJM789	0	58421.5	Right
SY_8	chr6:212856-267095	54239	YJM789	64288	2636	Right
SY_8	chr7:331.5-2235.5	1904	S288c	494744	0	Left
SY_8	chr7:2328.5-6674	4345.5	S288c	490305	1547.5	Left
SY_8	chr7:14543-21029	6486	YJM789	475950	13762	Left
SY_8	chr7:21059-172319	151260	YJM789	324660	20278	Left
SY_8	chr7:383906-384925	1019	YJM789	112054	383125	Left
SY_8	chr7:432550.5-637694.5	205144	YJM789	0	431770	Left
SY_8	chr7:969644.5-1079127	109482	YJM789	472666	4508	Right
SY_8	chr8:12692.5-59164	46471.5	S288c	46480	7187.5	Left
SY_8	chr8:59688-61861.5	2173.5	S288c	43782.5	54183	Left
SY_8	chr8:64485.5-88558.5	24073	S288c	17085.5	58980.5	Left
SY_8	chr8:92037.5-93002	964.5	S288c	12642	86532.5	Left
SY_8	chr8:94378.5-140831.5	46453	S288c	0	88873.5	Left
SY_8	chr8:212396-214234	1838	YJM789	106752	206891	Left
SY_8	chr8:288637-293554.5	4917.5	S288c	182993	262550	Right
SY_8	chr8:460095-464635.5	4540.5	S288c	354451	91469.5	Right
SY_8	chr8:464890-515941.5	51051.5	S288c	359246	40163.5	Right
SY_8	chr8:525448.5-525455.5	7	S288c	419804	30649.5	Right
SY_8	chr9:148912-162697	13785	YJM789	192990	141128	Left
SY_8	chr9:309419-371591	62172	S288c	0	67477	Right
SY_8	chr10:24456.5-24668.5	212	YJM789	411698	16689.5	Left
SY_8	chr10:25457.5-36448	10990.5	YJM789	399918	17690.5	Left
SY_8	chr10:77463-82218	4755	YJM789	354148	69696	Left
SY_8	chr10:146845-200798.5	53953.5	S288c	235568	139078	Left
SY_8	chr10:204211.5-333545.5	129334	S288c	102820	196444	Left
SY_8	chr10:334531-336485.5	1954.5	S288c	99880.5	326764	Left
SY_8	chr10:338492-359924	21432	S288c	76442	330725	Left
SY_8	chr10:396037-506757.5	110720	YJM789	0	238144	Right
SY_8	chr11:402924.5-528519	125594	YJM789	0	137385	Right
SY_8	chr11:530914-566893	35979	YJM789	90726	99011	Right
SY_8	chr11:569827.5-663691	93863.5	YJM789	129640	2213	Right
SY_8	chr12:127751.5-181496	53744.5	S288c	0	115666	Left
SY_8	chr12:254063.5-254842.5	779	YJM789	103176	241978	Left
SY_8	chr12:416646-419066.5	2420.5	S288c	265758	404561	Left
SY_8	chr12:490465-574436	83971	S288c	339577	478380	Left
SY_8	chr12:592632-626714.5	34082.5	S288c	441744	437566	Right
SY_8	chr12:1060733-1061966.5	1233.5	S288c	909845	2314.5	Right
SY_8	chr13:4873-12191.5	7318.5	S288c	255898	0	Left
SY_8	chr13:204389-398143	193754	S288c	0	198045	Left
SY_8	chr13:501527-502333.5	806.5	S288c	233437	421208	Right
SY_8	chr13:610872.5-758202	147330	YJM789	342782	165339	Right
SY_8	chr13:801005.5-866462	65456.5	S288c	532916	57079	Right
SY_8	chr14:12650.5-427701	415050	S288c	201115	5222.5	Left
SY_8	chr14:427701-430537.5	2836.5	YJM789	198278	352740	Right
SY_8	chr14:430537.5-488264.5	57727	S288c	140552	295014	Right
SY_8	chr14:582832.5-593902	11069.5	YJM789	34914	189376	Right
SY_8	chr14:611265.5-631978.5	20713	S288c	0	151300	Right
SY_8	chr14:633241-737336	104095	S288c	4425	45942	Right
SY_8	chr15:6024-23449	17425	YJM789	303194	5177	Left
SY_8	chr15:24446.5-24560	113.5	YJM789	302083	23599.5	Left
SY_8	chr15:24617-109435.5	84818.5	YJM789	217208	23770	Left
SY_8	chr15:212193-360069	147876	YJM789	0	211346	Left
SY_8	chr15:494273-496932.5	2659.5	S288c	167630	493426	Left
SY_8	chr15:774869.5-787554	12684.5	S288c	448226	296368	Right
SY_8	chr15:963206-1018359	55153	S288c	636563	65563	Right
SY_8	chr15:1020015.5-1072265.5	52250	S288c	693372	11656.5	Right
SY_8	chr16:6542-14434	7892	S288c	541581	0	Left
SY_8	chr16:16800-18507	1707	S288c	537508	9577	Left
SY_8	chr16:59294.5-62376	3081.5	S288c	493639	52071.5	Left
SY_8	chr16:64578.5-64613	34.5	S288c	491402	57355.5	Left
SY_8	chr16:163825.5-169492	5666.5	S288c	386523	156602	Left
SY_8	chr16:376246-378963.5	2717.5	S288c	177052	369023	Left
SY_8	chr16:525065-599444.5	74379.5	S288c	0	342952	Right
SY_8	chr16:811871-853471.5	41600.5	S288c	255856	88924.5	Right
SY_8	chr16:856895.5-875157	18261.5	S288c	300880	67239	Right
SY_8	chr16:876463-919911	43448	S288c	320448	22485	Right
SY_8	chr16:933539-942354	8815	YJM789	377524	42	Right
SY_9	chr1:18542.5-21425	2882.5	S288c	130099	17741.5	Left
SY_9	chr4:437788-440980	3192	YJM789	8786	436884	Left
SY_9	chr4:1523970-1524477	507	S288c	1074204	148	Right
SY_9	chr5:138964-148078.5	9114.5	YJM789	3967.5	132491	Left
SY_9	chr5:566553.5-566940	386.5	S288c	414508	2659	Right
SY_9	chr6:6289-16126	9837	S288c	132442	759	Left
SY_9	chr7:11089-11135	46	S288c	485844	10308	Left
SY_9	chr7:73908.5-74253	344.5	S288c	422726	73127.5	Left
SY_9	chr8:12692.5-23292.5	10600	YJM789	82351.5	7187.5	Left
SY_9	chr8:23292.5-36091.5	12799	S288c	69552.5	17787.5	Left
SY_9	chr9:329980-331655.5	1675.5	S288c	24031.5	107412	Right
SY_9	chr9:393200.5-393243	42.5	S288c	37513.5	45825	Right
SY_9	chr9:438997-439006	9	S288c	83310	62	Right
SY_9	chr10:24456.5-24510	53.5	S288c	411856	16689.5	Left
SY_9	chr10:25017.5-25324	306.5	S288c	411042	17250.5	Left
SY_9	chr10:663779-665155.5	1376.5	YJM789	227413	79746.5	Right
SY_9	chr12:1063177-1064276	1099	S288c	912289	5	Right
SY_9	chr13:521439.5-522957.5	1518	S288c	253350	400584	Right
SY_9	chr13:850210-923683	73473	YJM789	582120	0	Right
SY_9	chr15:120355-123357.5	3002.5	S288c	203286	119508	Left
SY_9	chr15:329999.5-427957.5	97958	YJM789	3356.5	329152	Left
SY_9	chr15:428017.5-621502.5	193485	YJM789	101374	427170	Left
SY_9	chr15:622032-623538	1506	YJM789	295389	460384	Right
SY_9	chr15:624422.5-1075521	451098	YJM789	297780	8401	Right
SY_10	chr1:18542.5-19877.5	1335	S288c	131646	17741.5	Left
SY_10	chr1:203886-203978.5	92.5	S288c	52362	25432.5	Right
SY_10	chr4:437788-440980	3192	YJM789	8786	436884	Left
SY_10	chr4:526672-526744	72	S288c	76906	525768	Left
SY_10	chr5:219874.5-222912.5	3038	YJM789	67828.5	213402	Left
SY_10	chr6:6328.5-16126	9797.5	S288c	132442	798.5	Left
SY_10	chr6:92365.5-92478.5	113	S288c	56089.5	86835.5	Left
SY_10	chr6:267086-267095	9	S288c	118518	2636	Right
SY_10	chr7:21059-21101	42	S288c	475878	20278	Left
SY_10	chr7:224740.5-227414.5	2674	S288c	269564	223960	Left
SY_10	chr7:432550.5-434385.5	1835	YJM789	62593.5	431770	Left
SY_10	chr8:95998.5-99802.5	3804	YJM789	5841.5	90493.5	Left
SY_10	chr8:525448.5-525455.5	7	S288c	419804	30649.5	Right
SY_10	chr9:33466.5-33494	27.5	S288c	322193	25682.5	Left
SY_10	chr9:438997-439006	9	S288c	83310	62	Right
SY_10	chr12:1029997.5-1032456	2458.5	YJM789	879110	31825	Right
SY_10	chr13:636998.5-850210	213212	S288c	368908	73331	Right
SY_10	chr13:850210-923683	73473	YJM789	582120	0	Right
SY_10	chr15:24446.5-24560	113.5	S288c	302083	23599.5	Left
SY_10	chr15:298547.5-306662	8114.5	YJM789	19981	297700	Left
SY_10	chr15:385150.5-385259.5	109	S288c	58507.5	384304	Left
SY_10	chr15:514903.5-514941	37.5	S288c	188260	514056	Left
SY_10	chr16:62827.5-63301.5	474	S288c	492714	55604.5	Left
SY_10	chr16:822703-824349.5	1646.5	S288c	266688	118046	Right
SY_10	chr16:880889.5-881139	249.5	YJM789	324874	61257	Right
